# Supplementary material for: B-Comet Assay (Comet Assay on Buccal Cells) for the Evaluation of Primary DNA Damage in Human Biomonitoring Studies
Source: MDPI journal article supplement (doi:10.3390/ijerph17249234), 2020-12-10
Supplement: s1 [file s1]

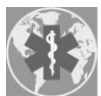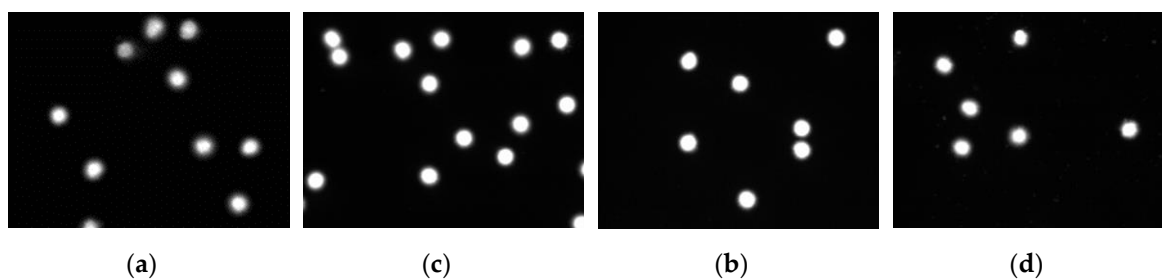

**Figure S1.** Microphotographs of cells after being processed for the comet assay: (a) buccal lymphocytes (BLs); (b) peripheral blood lymphocytes (PBLs); (c) whole venous blood leukocytes (WVBLs); and (d) whole capillary blood leukocytes (WCBLs). Cells were stained with ethidium bromide (50  $\mu$ L, 20  $\mu$ g/mL) and examined by using an Olympus BX41 (Japan) fluorescence microscope equipped with a high-sensitivity CCD (charge-coupled device) camera.

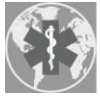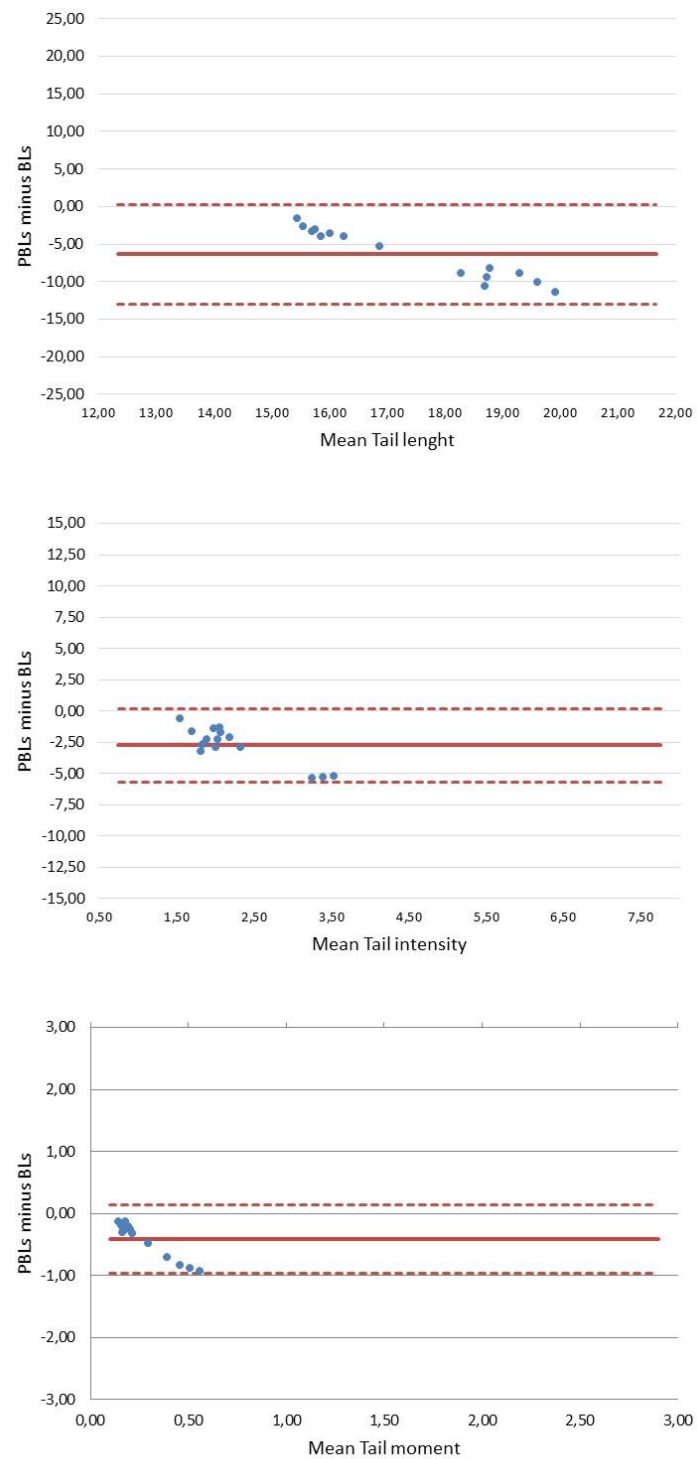

**Figure S2.** Bland-Altman plots illustrating the agreement between the damage parameters evaluated in peripheral blood lymphocytes (PBLs; gold standard test) and those evaluated in buccal lymphocytes (BLs).

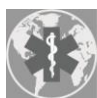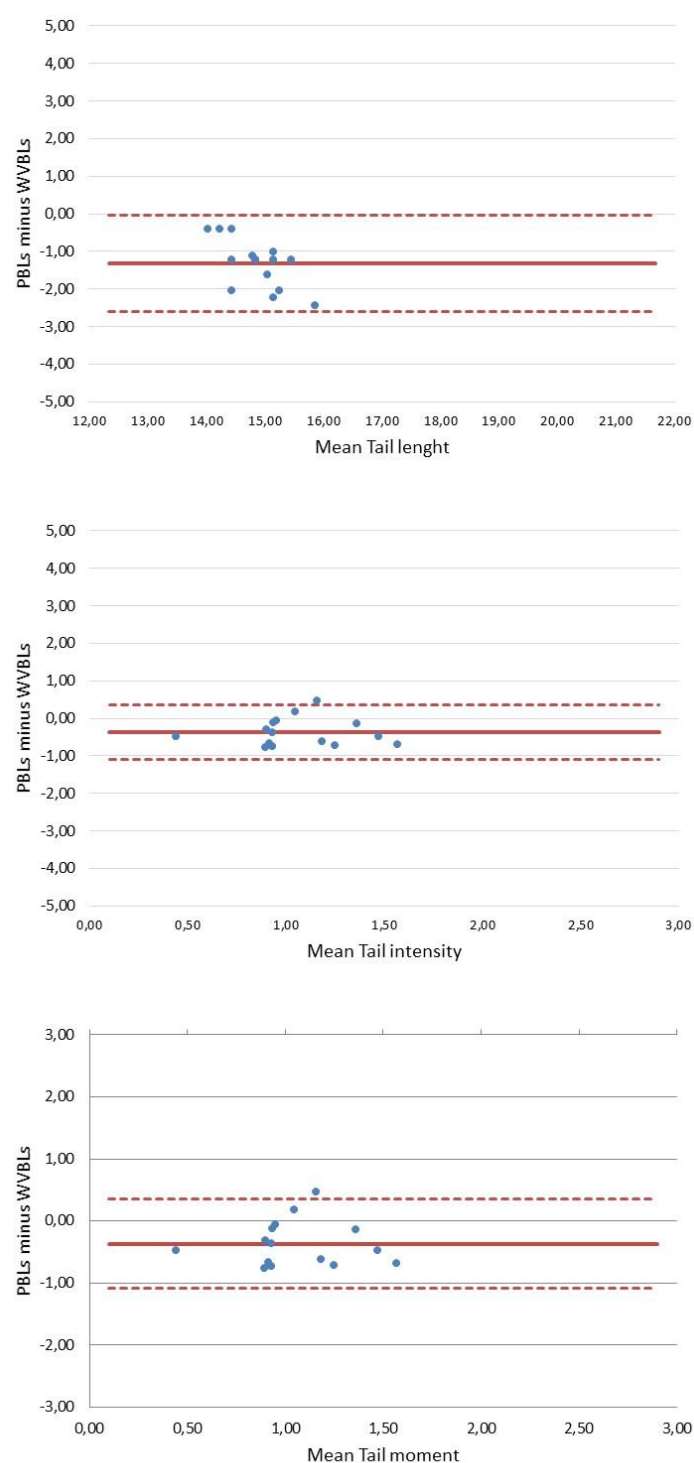

**Figure S3.** Bland-Altman plots illustrating the agreement between the damage parameters evaluated in peripheral blood lymphocytes (PBLs; gold standard test) and those evaluated in whole venous blood leukocytes (WVBLs).

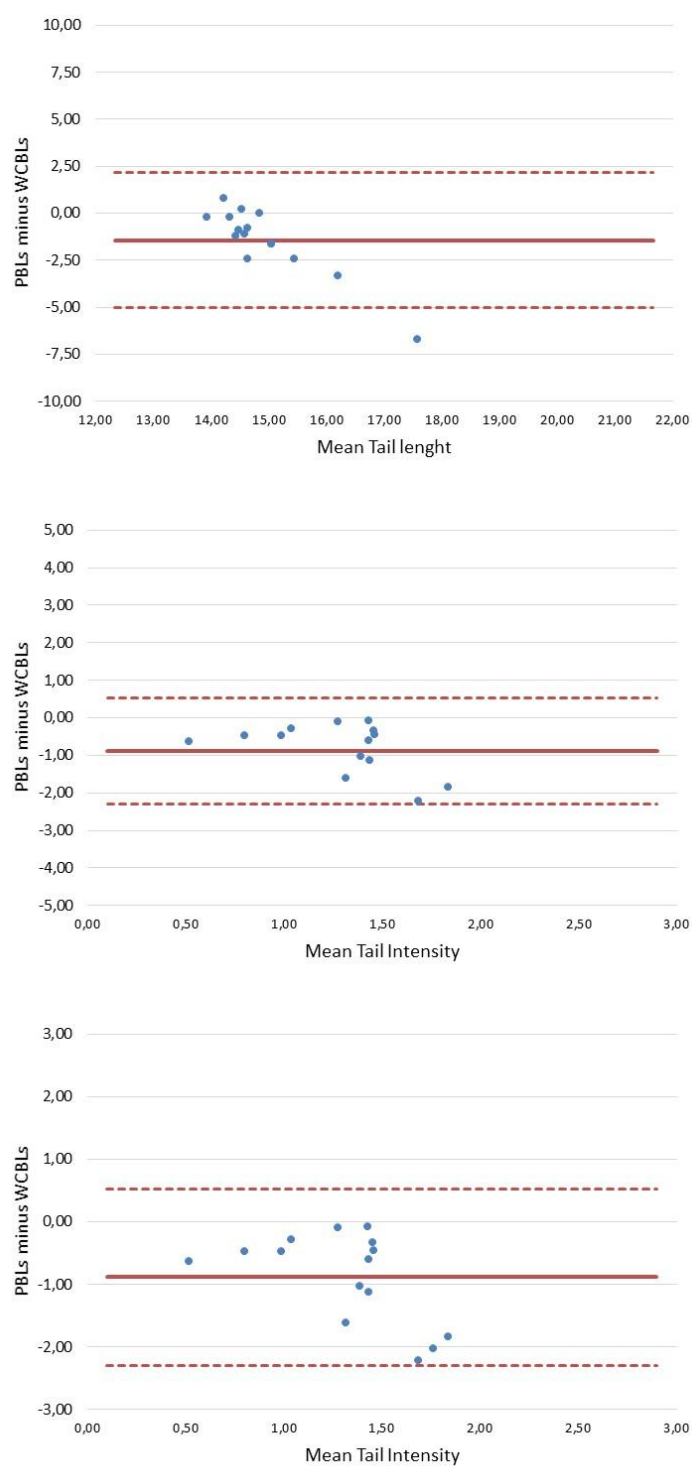

**Figure S4.** Bland-Altman plots illustrating the agreement between the damage parameters evaluated in peripheral blood lymphocytes (PBLs; gold standard test) and those evaluated in whole capillary blood leukocytes (WCBLs).

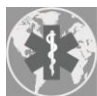

**Table S1.** Yield, viability, and cell diameter of peripheral blood lymphocytes (PBLs) and buccal lymphocytes (BLs).

|                                                | PBLs           | BLs             |
|------------------------------------------------|----------------|-----------------|
| Yield ( $\times 10^5/\text{mL}$ ) <sup>1</sup> | $37.5 \pm 5.9$ | $4.9 \pm 1.3$   |
| Viability (%) <sup>1</sup>                     | $97.3 \pm 0.3$ | $77.8 \pm 0.9$  |
| Cell diameter ( $\mu\text{m}$ ) <sup>1</sup>   | $12.6 \pm 0.4$ | $11.33 \pm 0.2$ |

<sup>1</sup> Group mean  $\pm$  standard error of the mean.

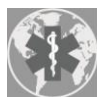

**Table S2.** Bland-Altman analysis: DNA parameters (comet assay) evaluated in peripheral blood lymphocytes (PBLs); buccal lymphocytes (BLs); whole venous blood leukocytes (WVBLs); whole capillary blood leukocytes (WCBLs).

| Differences                    | PBLs vs BLs    |                |                | PBLs vs WVBLs  |                |                | PBLs vs WCBLs  |                |       |
|--------------------------------|----------------|----------------|----------------|----------------|----------------|----------------|----------------|----------------|-------|
|                                | TL             | TI             | TM             | TL             | TI             | TM             | TL             | TI             | TM    |
| Arithmetic mean (Bias)         | -6.36          | -2.73          | -0.41          | -1.32          | -0.37          | -0.04          | -1.44          | -0.89          | -0.09 |
| 95% CI                         | [-8.23; -4.49] | [-2.73; -3.56] | [-0.57; -0.26] | [-1.68; -0.96] | [-0.57; -0.17] | [-0.06; -0.01] | [-2.46; -0.43] | [-1.28; -0.49] | -0.05 |
| Standard Error                 | 0.87           | 0.39           | 0.07           | 0.17           | 0.10           | 0.01           | 0.47           | 0.18           | 0.02  |
| Minimum                        | -11.38         | -5.36          | -0.94          | -2.44          | -0.77          | -0.09          | -6.07          | -2.21          | -0.20 |
| Maximum                        | -1.63          | -0.63          | -0.13          | -0.41          | 0.47           | 0.04           | 0.81           | -0.08          | -0.01 |
| Standard deviation (Precision) | 3.38           | 1.49           | 0.28           | 0.65           | 0.37           | 0.04           | 1.84           | 0.72           | 0.06  |
| Lower limit                    | -12.98         | -5.66          | -0.97          | -2.59          | -1.09          | -0.11          | -5.04          | -2.29          | -0.21 |
| Upper limit                    | 0.26           | 0.19           | 0.14           | -0.05          | 0.35           | 0.04           | 2.16           | 0.52           | 0.04  |

TL: tail length; TI: tail intensity; TM: tail moment

CI: confidence interval
